# Supplementary material for: The HSV-1 Latency-Associated Transcript Functions to Repress Latent Phase Lytic Gene Expression and Suppress Virus Reactivation from Latently Infected Neurons
Source: PLoS Pathog. 2016 Apr 7;12(4):e1005539. doi: 10.1371/journal.ppat.1005539 (PMC4824392; doi:10.1371/journal.ppat.1005539)
Supplement: S1 Dataset — (XLSX) [file ppat.1005539.s006.xlsx]

## Sheet: Fig1c
Fig1c - qRT-PCR
	major LAT copies (-RT negative control)	Cyclophilin A copies (-RT negative control)	Normalised to 1,0000 cyclophilin A copies	Mean	St. Dev	SEM
SC16CMVluc	513112	3011402	17039	23252.2	13527.8	7810.28
	843600	2175884	38770.4
	235873	1691184	13947.2
SC16CMVluc∆LAT-GFP-1	56	5647015	0.991674	4.49473	4.16719	2.40593
	197	2164084	9.10316
	84	2478346	3.38936
SC16CMVluc∆LAT-GFP-2	67	2341183	2.8618	3.13088	0.885788	0.51141
	125	3033977	4.12
	61	2530246	2.41083
SC16CMVlucREV	285392	1346477	21195.5	102799	72852.7	42061.5
	3798097	3016650	125904
	3937787	2441325	161297

## Sheet: Fig1d
Fig1d - Growth Curve
	Titre (log10 PFU ml-1)
	Input	0 (hours post-infection)	4	12	24	36	48	60	72
SC16	3.03253	0	0	3.83109	5.79395	6.61396	7.18877	7.46073	7.60206
SC16CMVluc	3.02348	0	0	3.64782	5.68921	6.55091	7.18564	7.50816	7.40749
SC16CMVluc∆LAT-GFP-1	2.89086	0	0	3.60206	5.4437	6.30702	7.0048	7.3176	7.52863
SC16CMVluc∆LAT-GFP-2	3.1213	0	0	3.71786	5.49292	6.4437	6.92082	7.14267	7.30103
SC16CMVlucREV	3.01889	0	0	3.67923	5.85194	6.55091	7.01889	7.63682	7.39987

## Sheet: Fig1e
Fig1e - Luciferase expression
	3 (hours post-infection)	4	8	24	31	49	lysis buffer	lysis buffer
SC16CMVluc	562999	1055975	20807369	613330748	225036335	289313884	-3409	-8
SC16CMVluc∆LAT-GFP-1	410982	1187239	7791818	518854377	307858110	261425193	-2566	4
SC16CMVluc∆LAT-GFP-2	546627	2087833	12902162	288825648	349836483	199804961	-2114	3
SC16CMVlucREV	665240	2413685	20297137	331642221	393280368	271741396	-2807	-3
Uninfected	-9	4	53	-2	706	689	-31	-4
SC16CMVluc	517500	2151272	19433291	260967772	458761195	315351891	-3464	2
SC16CMVluc∆LAT-GFP-1	284475	630357	7134934	292692638	543883988	251372576	-2886	-7
SC16CMVluc∆LAT-GFP-2	468304	780897	13983280	122442651	430339305	317811809	-3214	-8
SC16CMVlucREV	393056	1094641	15723511	270411081	448935686	247398483	-2586	7
Uninfected	489	-17	-52	-98	-52	-99	-2	-2
SC16CMVluc	378038	1584909	18415365	656401102	594392441	397407113	-4517	-2
SC16CMVluc∆LAT-GFP-1	249166	663141	6546513	566483327	340713455	342037259	-3282	2
SC16CMVluc∆LAT-GFP-2	357452	1441957	15753322	533323101	530901778	246537351	-2823	-1
SC16CMVlucREV	372975	1870983	7636708	613618096	339477921	234515935	-2449	-3
Uninfected	9	-10	27	44	-201	-77	-11	2
AVERAGE	3	4	8	24	31	49	lysis buffer	lysis buffer
SC16CMVluc	486179	1.59739e+06	1.9552e+07	5.10233e+08	4.26063e+08	334024296	-3796.67	-2.66667
SC16CMVluc∆LAT-GFP-1	314874	826912	7157755	4.59343e+08	3.97485e+08	2.84945e+08	-2911.33	-0.333333
SC16CMVluc∆LAT-GFP-2	457461	1.4369e+06	1.42129e+07	314863800	4.37026e+08	2.54718e+08	-2717	-2
SC16CMVlucREV	477090	1793103	14552452	4.05224e+08	3.93898e+08	2.51219e+08	-2614	0.333333
Uninfected	163	-7.66667	9.33333	-18.6667	151	171	-14.6667	-1.33333
SD
SC16CMVluc	96376.3	547755	1.20041e+06	2.16942e+08	1.86836e+08	5.64139e+07	624.433	5.03322
SC16CMVluc∆LAT-GFP-1	85083.5	312482	622966	1.46275e+08	1.27845e+08	4.96982e+07	358.672	5.85947
SC16CMVluc∆LAT-GFP-2	95052.5	653483	1.43939e+06	2.06674e+08	9.07177e+07	5.94272e+07	557.608	5.56776
SC16CMVlucREV	163251	662962	6.41094e+06	1.83053e+08	5.47315e+07	1.89045e+07	180.635	5.7735
Uninfected	282.468	10.6927	54.6839	72.4523	486.384	448.736	14.8436	3.05505
SEM
SC16CMVluc	55642.9	316247	693059	1.25251e+08	1.0787e+08	3.25706e+07	360.516	2.90593
SC16CMVluc∆LAT-GFP-1	49123	180412	359670	8.44522e+07	7.38113e+07	2.86932e+07	207.079	3.38296
SC16CMVluc∆LAT-GFP-2	54878.6	377288	831029	1.19323e+08	5.23759e+07	3.43103e+07	321.935	3.21455
SC16CMVlucREV	94253.3	382761	3.70136e+06	1.05686e+08	3.15992e+07	1.09145e+07	104.29	3.33333
Uninfected	163.083	6.17342	31.5718	41.8303	280.814	259.078	8.56997	1.76383

## Sheet: Fig2ab
Fig2ab - Day 4 titres
	PFU per whisker pad pair	Mean	St Dev	SEM	PFU per TG pair	Mean	St Dev	SEM
SC16CMVluc	203333	123539	93843.5	33178.7	888.889	251.389	268.701	95.0001
	145556				69.4444
	31400				116.667
	30800				258.333
	116667				77.7778
	106667				255.556
	51111.1				122.222
	302778				222.222
SC16CMVluc∆LAT-GFP-1	32000	49869.4	38369.1	13565.5	441.667	204.514	120.093	42.4592
	11000				183.333
	26600				286.111
	13800				116.667
	31111.1				119.444
	106667				261.111
	86666.7				152.778
	91111.1				75
SC16CMVluc∆LAT-GFP-2	3000	37627.8	27632.9	9769.7	141.667	150	63.1164	22.315
	16400				150
	22000				105.556
	37400				255.556
	55555.6				163.889
	86666.7				133.333
	21111.1				205.556
	58888.9				44.4444
SC16CMVlucREV	14800	94311.1	106058	37497.2	113.889	91.3194	31.6171	11.1783
	13200				133.333
	7000				125
	20600				58.3333
	311111				97.2222
	113333				63.8889
	107778				88.8889
	166667				50

## Sheet: Fig2d
Fig2d - Acute infection luciferase measurements - whisker pads
Data are maximum radiance, with unit ps-1cm-2sr-1
	2 (days post-infection)	4	6	8
SC16CMVluc	8358000	2118000	86180	25930
	1658000	994900	16410	17050
	31170	3102000	16990	6078
	1690000	5318000	40090	9448
		748800	36680	5935
		1690000	12490	14570
		333500	8421	7260
		730000
SC16CMVluc∆LAT-GFP-1	831800	969000	7397	7700
	51070	834700	7896	7132
	2338000	2275000	10400	12990
	2544000	2974000	7426	6451
		610100	9483	9384
		2046000	143200	8605
		1108000	100800	8097
		1576000
SC16CMVluc∆LAT-GFP-2	4406000	808800	10980	6563
	1803000	1797000	20440	6560
	5291000	1634000	12920	8737
	4099000	1983000	13340	9120
		1282000	27170	7508
		1958000	11250	8219
		2147000	82060	9033
		1720000
SC16CMVlucREV	5883000	1825000	18720	7691
	2401000	1162000	19000	111900
	2880000	951600	11220	17380
	3304000	880100	9909	10700
		611400	21460	15480
		1204000	253200	9895
		1020000	16640	10180
		430900

## Sheet: Fig2e
Fig2e - Acute infection luciferase measurements - TG
Data are in arbitrary luciferase units
	2 (days post-infection)	4	6	8
SC16CMVluc	27405.5	97556.5	7376	21252
	23110.5	169940	30585.5	38932
	14801	229979	33263.5	27711.5
	31225.5	351415	41273	33748.5
	55266.5	80212	28636.5	16938.5
	37785.5	67085.5	24205.5	13663.5
	17303	220687	30826.5	19033
	35625.5	163729	37293.5	32309
SC16CMVluc∆LAT-GFP-1	1496.5	207508	20788.5	23869.5
	779	152481	98262	17944
	13846	188290	24513	22694.5
	5065.5	175495	17340	15467
	23438.5	89818.5	21066	6280.5
	12799	129352	32531.5	16464
	18412	199378	16606.5	8102.5
	24940.5	214183	33251	16929
SC16CMVluc∆LAT-GFP-2	28026	164415	19597.5	17134
	35452	322294	29951.5	14044
	126978	311710	12176	19985
	41024.5	351554	40079.5	53048
	63909	391164	17091	32522
	36895.5	705122	57725	45610.5
	25160.5	119394	27523	17261
	13844	303676	22389	19125.5
SC16CMVlucREV	11763	386468	54203	20675.5
	18195	163933	71742.5	24480.5
	34779.5	405714	22220.5	20561
	53379.5	288466	66880.5	12625.5
	17227.5	337902	54321	26794.5
	14187	147785	70773.5	34294.5
	15313	165007	30670	7411.5
	9192	288795	52470.5	17771.5

## Sheet: Fig3b
Fig3b- Luciferase expression during latency
		Radiance per TG (ps-1cm-2sr-1)	HSV DNA loads (ICP0 DNA copies / APRT DNA copies)	Relative HSV DNA loads	TG radiance normalised to relative HSV DNA	Median normalised TG radiance
SC16CMVluc		52130	0.0462075	1	52130	78625.9
		115700	0.0199062	0.430801	268570
		7958	0.00279389	0.060464	131616
		57820	0.0293572	0.635334	91007.2
		13540	0.0283534	0.61361	22066.1
		24960	0.0338562	0.732699	34065.8
		16540	0.00779837	0.168769	98004
		50880	0.0247253	0.535094	95086.1
		53200	0.0144128	0.311915	170559
		24070	0.0338562	0.732699	32851.1
		11180	0.00779837	0.168769	66244.6
		10470	0.0103594	0.224192	46700.9
SC16CMVluc∆LAT-GFP-1		120100	0.0334625	0.724179	165843	164004
		85880	0.0913011	1.9759	43463.8
		55080	0.0394729	0.854253	64477.4
		162600	0.0967963	2.09482	77620
		45840	0.0409593	0.886422	51713.5
		74800	0.0213136	0.46126	162165
		115900	0.019075	0.412811	280758
		71450	0.0194866	0.42172	169425
		136900	0.00356831	0.0772237	1.77277e+06
		58240	0.0124859	0.270214	215533
		108000	0.056311	1.21865	88622.3
		108100	0.0106022	0.229448	471131
SC16CMVluc∆LAT-GFP-2		119700	0.0259546	0.561698	213104	217932
		183200	0.110446	2.39023	76645.5
		56600	0.0114393	0.247564	228628
		98620	0.0425645	0.92116	107061
		173700	0.0360307	0.77976	222761
		231000	0.0408844	0.884801	261076
		25220	0.0134582	0.291256	86590.5
		57680	0.00540849	0.117048	492789
		144000	0.056928	1.23201	116882
		76530	0.010151	0.219683	348366
		85220	0.03558	0.770006	110675
		150000	0.00557164	0.120579	1.244e+06
SC16CMVlucREV		46810	0.0274959	0.595053	78665.3	44508.3
		50740	0.0371739	0.8045	63070.2
		27980	0.0193612	0.419006	66777.1
		26720	0.0362121	0.783686	34095.3
		79310	0.110042	2.38148	33302.9
		28740	0.0124582	0.269614	106597
		10320	0.0231396	0.500777	20608
		12690	0.0294283	0.636873	19925.5
		11200	0.0240241	0.519918	21541.9
		50320	0.0130838	0.283154	177712
		12720	0.0250614	0.542366	23452.8
		11710	0.00985208	0.213214	54921.3

## Sheet: Fig4ab
Fig4ab- panAc3 and H3K27me3 enrichment
			pan-acetylated H3 IP		H3K27me3 IP		pan-acetylated H3		H3K27me3
							% Enrichment [IP / (Input +IP)]		% Enrichment [IP / (Input +IP)]
TG	Input APRT copies	Input upHoxa5 copies	APRT	upHoxa5	APRT	upHoxa5	APRT	upHoxa5	APRT	upHoxa5
1	172701	30041	4389.2	118	1385.2	7846.8	0.0247851	0.0039126	0.00795698	0.207106
2	150425	18730	5298	122	884.8	9798.8	0.0340219	0.00647146	0.00584761	0.34347
3	286123	41765	3671.6	59.6	1611.6	7096.8	0.0126697	0.001425	0.00560099	0.145242
4	220586	34976	4419.6	58	1103.6	5518	0.0196422	0.00165553	0.00497813	0.136267
5	78372	29909	3557.2	53.6	988.8	9735.2	0.043418	0.0017889	0.0124596	0.245564
6	63645	29251	3666.4	56	709.6	6453.2	0.0544692	0.00191081	0.0110264	0.180741
7	66692	30301	3260	58	894.8	3653.2	0.0466034	0.00191047	0.0132393	0.107592
8	69363	28076	5150.8	72.8	972.8	11362.4	0.0691255	0.00258626	0.0138308	0.288105
9	261188	42772	3607.2	54.8	464	2691.2	0.0136226	0.00127957	0.00177335	0.0591951
10	298828	38192	8227.6	113.6	1412.4	3965.2	0.0267951	0.00296562	0.00470423	0.0940575
11	188084	43692	5626.8	99.2	1323.6	5328.4	0.0290474	0.0022653	0.0069881	0.108698
12	191763	35201	5832	74.4	1557.2	6026	0.0295149	0.00210912	0.00805503	0.146166
13	209974	35662	4073.2	45.2	691.2	5593.2	0.0190294	0.00126585	0.00328104	0.135576
14	125734	29204	6476	64.8	943.2	6372	0.0489827	0.00221396	0.0074457	0.17911
15	187259	29242	3674	76.8	776.4	5154.8	0.0192424	0.00261948	0.00412901	0.149863
16	150776	23962	3826.8	111.2	1004	6213.6	0.0247525	0.00461924	0.00661484	0.205915
						Mean	0.0322326	0.00256245	0.00737069	0.170792
						St. Dev	0.0160418	0.0013858	0.00359462	0.0740329
						SEM	0.00401045	0.00034645	0.000898655	0.0185082

## Sheet: Fig4c
Fig4c- Fold H3K27me3 enrichment normalised to APRT
				ICP0 promoter
				1	2	3	4	Mean	St. Dev	SEM
SC16CMVluc				23.6507	19.4796	43.2297	35.9213	30.5703	10.9511	5.47554
SC16CMVluc∆LAT-GFP-1				42.4379	17.3609	25.9664	19.151	26.2291	11.4242	5.7121
SC16CMVluc∆LAT-GFP-2				38.3829	10.0366	20.3347	39.9851	27.1848	14.494	7.247
SC16CMVlucREV				42.9986	17.9197	17.1991	27.1604	26.3194	12.0088	6.00442
				VP16 promoter
				1	2	3	4	Mean	St. Dev	SEM
SC16CMVluc				23.9764	24.9456	28.6067	30.7731	27.0754	3.17056	1.58528
SC16CMVluc∆LAT-GFP-1				38.7612	20.5205	24.0259	23.247	26.6387	8.22027	4.11013
SC16CMVluc∆LAT-GFP-2				33.3639	5.45238	18.7076	32.2448	22.4422	13.1399	6.56997
SC16CMVlucREV				41.1402	20.0589	13.4136	33.4101	27.0057	12.5672	6.2836
				Luciferase 5' CDS
				1	2	3	4	Mean	St. Dev	SEM
SC16CMVluc				21.1388	16.4256	23.9629	33.6628	23.7975	7.2747	3.63735
SC16CMVluc∆LAT-GFP-1				28.7428	14.8834	16.7822	15.3853	18.9484	6.57883	3.28941
SC16CMVluc∆LAT-GFP-2				25.2416	4.1923	15.4761	20.0816	16.2479	8.9725	4.48625
SC16CMVlucREV				34.4738	17.782	11.8507	25.2917	22.3496	9.77652	4.88826
				LAT Enhancer
				1	2	3	4	Mean	St. Dev	SEM
SC16CMVluc				35.1447	26.665	58.4256	62.2093	45.6111	17.3994	8.69968
SC16CMVluc∆LAT-GFP-1				52.0095	12.7886	40.9548	26.9693	33.1806	17.0233	8.51167
SC16CMVluc∆LAT-GFP-2				41.3595	12.6653	24.2152	40.0174	29.5644	13.6941	6.84705
SC16CMVlucREV				56.1645	22.2147	61.2296	45.9921	46.4002	17.3239	8.66197

## Sheet: Fig5bc
Fig5b - Day 4/5 titres
	SC16CMVlacZ∆LAT-GFP				SC16CMVlacZREV
	WP 4dpi	WP 5dpi	TG 4dpi	TG 5dpi	WP 4dpi	WP 5dpi	TG 4dpi	TG 5dpi
Titres (PFU per tissue)	41000	116667	20	15.625	8800	105556	210	12.5
	43000	61111.1	25	167.361	61000	94444.4	275	6.25
	22000	222222	80	12.5	33800	244444	90	88.5417
	88000	32777.8	950	41.8403	10200	68055.6	275	43.4028
	16000	72222.2	235	3.125	22000	44444.4	120	27.9514
Mean	42000	101000	262	48.0903	27160	111389	194	35.7292
St. Dev.	28257.7	74185.3	394.313	68.204	21451.1	78077.3	86.1249	32.8525
SEM	12637.2	33176.7	176.342	30.5017	9593.21	34917.2	38.5162	14.6921
Fig5c - LAT qRT-PCR
	major LAT copies (-RT negative control)	Cyclophilin A copies (-RT negative control)	Normalised to 1,0000 cyclophilin A copies	Mean	St. Dev	SEM
SC16CMVlacZ∆LAT-GFP	5385	1013377	53.1392	17.646	19.969	8.93039
	1054	2025745	5.20302
	1399	1561803	8.9576
	2141	2251360	9.50981
	1979	1732896	11.4202
SC16CMVlacZREV	1949126	960492	20293	7076.01	7611.38	3403.91
	955480	2491915	3834.32
	767988	2225719	3450.52
	1491592	2304262	6473.19
	262441	1974666	1329.04
Fig5e - βgal-positive cells per TG
	βgal-positive cells per TG
	SC16CMVlacZ∆LAT-GFP	SC16CMVlacZREV
	8	0
	27	2
	5	4
	15	0
	25	4
	11	1
	12	2
	4	0
	8	2
	11	1
Mean	12.6	1.6
St. Dev	7.79173	1.50555
SEM	2.46396	0.476095
Fig5f - HSV DNA loads per TG pair
SC16CMVlacZ∆LAT-GFP	APRT DNA copies	ICP0 DNA copies	Ratio	/100,000 cells	Mean	St. Dev	SEM
1	189843	369	0.00194371	194.371	105.495	60.4663	27.0414
2	309892	336	0.00108425	108.425
3	278078	331	0.00119031	119.031
4	246587	185	0.000750242	75.0242
5	564891	173	0.000306254	30.6254
SC16CMVlacZREV	APRT DNA copies	ICP0 DNA copies	Ratio	/100,000 cells	Mean	St. Dev	SEM
1	424629	309	0.000727694	72.7694	80.6247	27.7526	12.4113
2	396952	375	0.000944699	94.4699
3	592548	419	0.000707116	70.7116
4	606151	277	0.000456982	45.6982
5	272025	325	0.00119474	119.474

[truncated: 10 more sheets: Fig6, Fig7di, Fig7j, S Fig1, S Fig2, S Fig3ab, S Fig3cd, S Fig3ef, S Fig4, S Fig5]
